# Supplementary material for: Stimulation of osteogenesis and angiogenesis by micro/nano hierarchical hydroxyapatite via macrophage immunomodulation
Source: Royal Society of Chemistry journal article supplement (doi:10.1039/c9nr05730g), 2019-01-01
Supplement: c9nr05730g1.pdf [file c9nr05730g1.pdf]

## Supplementary material

**Table 1.** Three different aqueous system for hydrothermally treating to generate nanostructures on HA bioceramics.

| Nanostructures | nanoneedle                                                                                | nanosheet                                                                | nanorod       |
|----------------|-------------------------------------------------------------------------------------------|--------------------------------------------------------------------------|---------------|
|                | Simpfiled SBF<br>with 0.02 M<br>aspartic acid, pH<br>of the solutions<br>was adjusted 7.4 | Simpfiled SBF<br>with 0.02 M<br>aspartic acid<br>without pH<br>adjustion | Simpfiled SBF |

**Simpfiled SBF:** 140 mM NaCl, 2.5 mM CaCl<sub>2</sub> and 1 mM K<sub>2</sub>HPO<sub>4</sub>, pH of the solutions was adjusted to a specific value at 7.4

**Table 2.** The primer sequence of all genes used in the Real-time PCR.

| Gene          | Direction | Primer sequence                 |
|---------------|-----------|---------------------------------|
| GAPDH (mouse) | Forward   | TGACCACAGTCCATGCCATC            |
|               | Reverse   | GACGGACACATTGGGGGTAG            |
| CCR7          | Forward   | TGTACGAGTCGGTGTGCTTC            |
|               | Reverse   | GGTAGGTATCCGTCATGGTCTTG         |
| iNOS          | Forward   | CACCAAGCTGAACTTGAGCG            |
|               | Reverse   | CGTGGCTTTGGGCTCCTC              |
| TNF- $\alpha$ | Forward   | CCTCCCTCTCATCAGTTCTA            |
|               | Reverse   | ACTTGGTGGTTTGCTACGAC            |
| ARG-1         | Forward   | CCAGAAGAATGGAAGAGTCAGTGT        |
|               | Reverse   | GCAGATATGCAGGGAGTCACC           |
| CD206         | Forward   | CTCTGTTCAGCTATTGGACGC           |
|               | Reverse   | CGGAATTTCTGGGATTCAGCTTC         |
| IL-10         | Forward   | GAGAAGCATGGCCAGAAATC            |
|               | Reverse   | GAGAAATCGATGACAGCGCC            |
| GAPDH (human) | Forward   | GATTTGGTCGTATTGGGCG             |
|               | Reverse   | CTGGAAGATGGTGATGG               |
| BMP2          | Forward   | TTCGGCCTGAAACAGAGACC            |
|               | Reverse   | CCTGAGTGCCTGCGATACAG            |
| COL1          | Forward   | GCAATGACGAGACTGGCAACC           |
|               | Reverse   | TCAGCACCACCGATGTCCAAA           |
| RUNX2         | Forward   | TGGTTACTGTCATGGCGGGTA           |
|               | Reverse   | TCTCAGATCGTTGAACCTTGCTA         |
| eNOS          | Forward   | TGTCCAACATGCTGCTGGAAATTG        |
|               | Reverse   | AGGAGGTCTTCTTCCTGGTGATGCC       |
| VEGF          | Forward   | TAT GCG GAT CAA ACC TCA CCA     |
|               | Reverse   | CAC AGG GAT TTT TCT TGT CTT GCT |

| Gene | Direction | Primer sequence      |
|------|-----------|----------------------|
| BFGF | Forward   | CAATTCCCATGTGCTGTGAC |
|      | Reverse   | ACCTTGACCTCTCAGCCTCA |

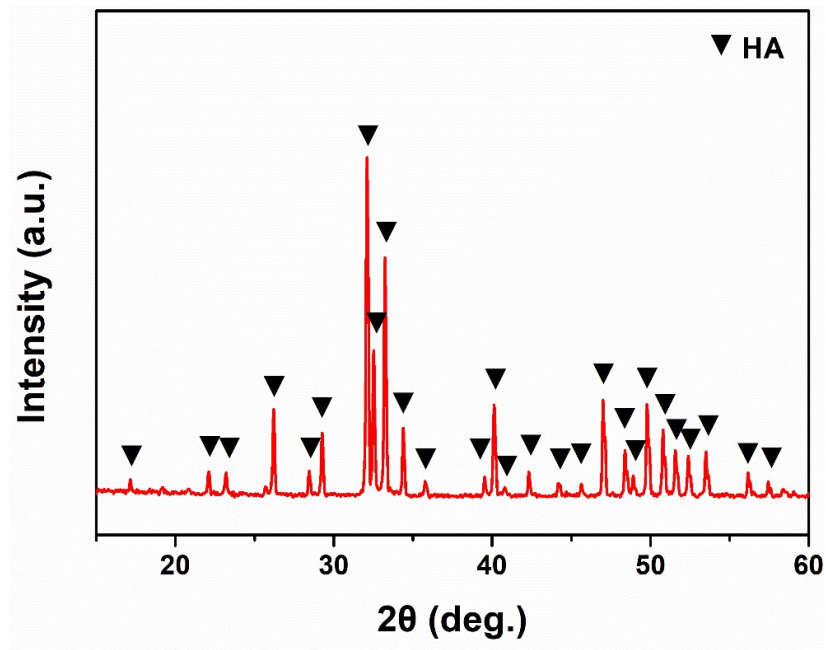

**Figure S1.** XRD patterns of the nanoneedle structures.

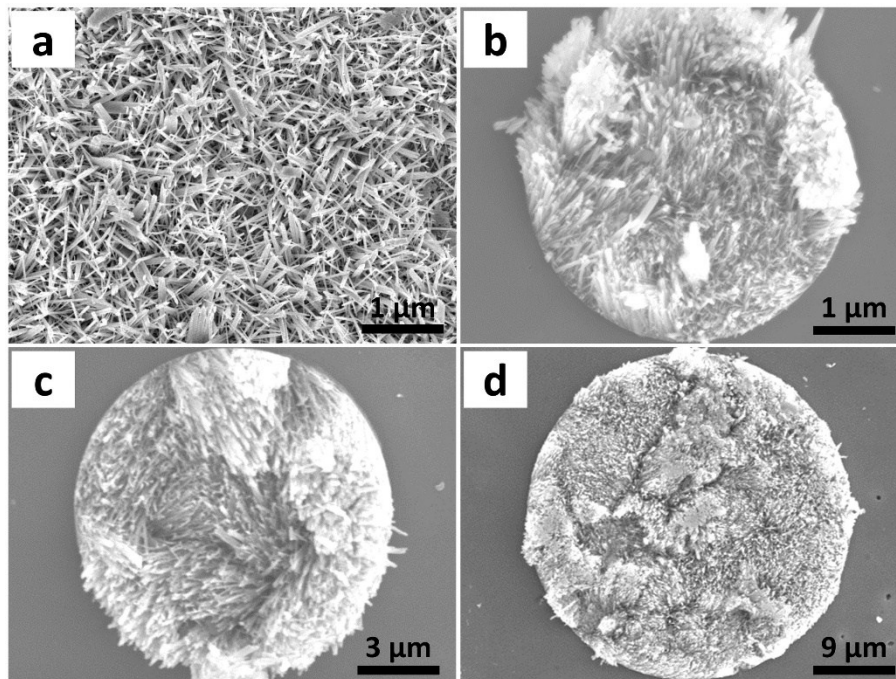

**Figure S2.** High magnification images of nanoneedle structures in Nano-group (a), 4-Nano group (b), 12-Nano group (c) and 36-Nano group (d).

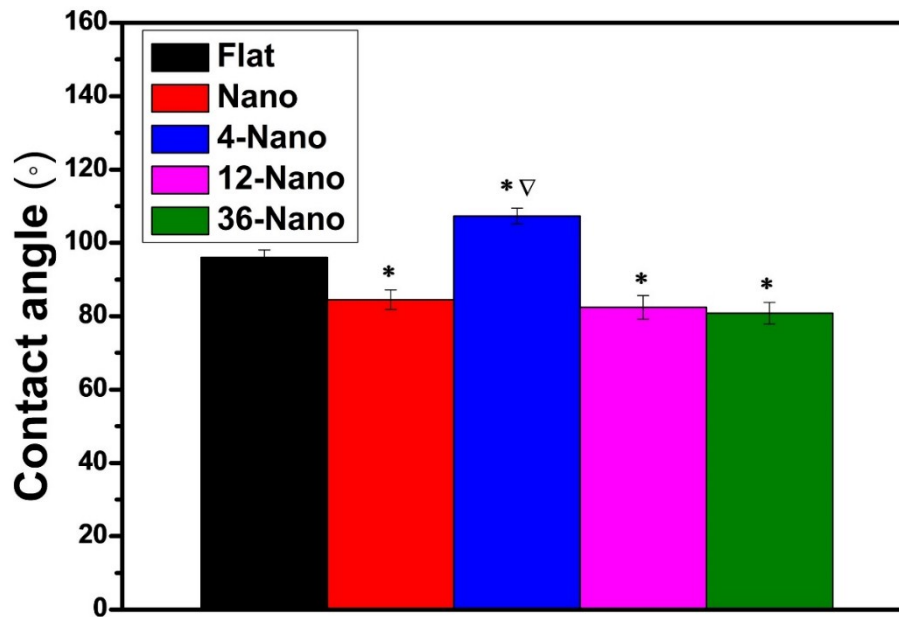

**Figure S3.** Contact angle of HA bioceramics with different topographical surfaces. \*: Significant difference ( $P < 0.05$ ) compared to the Flat group. ∇: Significant difference ( $P < 0.05$ ) compared to the Nano group.

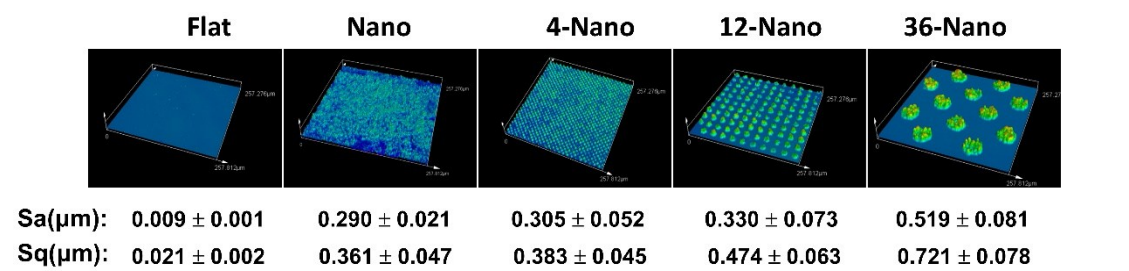

**Figure S4.** 3D images and the surface roughness of HA bioceramics with different topographical surfaces.
